28

29 **Abstract:**

30 Lipid compositions of cells, tissues and bio-fluids are complex, with varying  
31 concentrations and structural diversity, which makes their identification challenging.  
32 Newer methods for comprehensive analysis of lipids are thus necessary. Herein, we  
33 propose a targeted-mass spectrometry based method for large-scale lipidomics using a  
34 combination of variable retention time window and relative dwell time weightage. Using  
35 this, we detected more than 1000 lipid species, including structural isomers. The limit of  
36 detection varied from femtomolar to nanomolar range and the coefficient of variance  
37 <30% for 849 lipid species. We used this method to identify lipids altered due to Vitamin  
38 B<sub>12</sub> deficiency and found that the levels of lipids with  $\omega$ -3 fatty acid chains decreased  
39 while those with  $\omega$ -6 increased. This method enables identification of by far the largest  
40 number of lipid species with structural isomers in a single experiment and would  
41 significantly advance our understanding of the role of lipids in biological processes.

42

43

44

45

46

47

48

49

50

51

52

53

54

55

56

57

58

## 59 Introduction:

60 Lipid constitutes highly diverse biomolecules, which play an important role in the normal  
61 functioning of the body, maintaining the cellular homeostasis, cell signaling and energy  
62 storage<sup>1-5</sup>. Dysregulation of lipid homeostasis is associated with a large number of  
63 pathologies such as obesity and diabetes<sup>6,7</sup>, cardiovascular disease<sup>8</sup>, cancer<sup>9</sup> and other  
64 metabolic diseases<sup>10</sup>. Lipid compositions of cells, tissues and bio-fluids are complex,  
65 reflecting a wide range of concentrations of different lipid classes and structural diversity  
66 within lipid species<sup>11,12</sup>. Although the exact number of distinct lipids present in cells is  
67 not exactly known, it is believed that the cellular lipidome consists of more than 1000  
68 different lipid species each with several structural isomers<sup>4,13-15</sup>.

69  
70 Identification of lipids using traditional methods like thin layer chromatography (TLC),  
71 nuclear magnetic resonance (NMR), and soft ionization techniques (field desorption,  
72 chemical ionization or fast atom bombardment) are limited by their lower sensitivity and  
73 accuracy, hence is not suitable for comprehensive lipidomics studies<sup>16,17</sup>. Recent  
74 advances in electrospray ionization-mass spectrometry (ESI-MS) based lipidomics have  
75 enabled accurate identification of a large number of lipid species from various biological  
76 sources<sup>18,19</sup>. Analysis of lipids in both positive and negative ion modes in a single mass  
77 spectrometric scan using untargeted or targeted approaches have been used for  
78 greater coverage with increasing sensitivity and specificity<sup>20,21</sup>. The untargeted  
79 lipidomics approach however has some major challenges especially with respect to  
80 specific identification (without standards) and characterization of the lipid species, time  
81 required to process large quantity of raw data and the bias towards the detection of  
82 lipids with high-abundance<sup>19,22</sup>. These problems are greatly reduced in a targeted  
83 approach using multiple reaction monitoring (MRM), since defined groups of chemically  
84 characterized and annotated lipid species are analyzed<sup>22,23</sup>. The use of MRM enables  
85 simultaneous identification of numerous lipid species, including those with low  
86 abundance<sup>24,25</sup>. The number of lipid species identified could be further increased by  
87 using scheduled MRM, where the MRM transitions are monitored only around the  
88 expected retention time of the eluting lipid species<sup>21,26,27</sup>. This enables monitoring of  
89 greater number of MRM transitions in a single MS acquisition. Using scheduled MRM,  
90 Takeda et. al., and other groups, were able to identify/ quantify 413 of lipid species  
91 including isomers of phospholipids (PLs) and diacylglycerol (DAG) in a single targeted  
92 scan<sup>21,28,29</sup>. However, identification of triacylglycerols (TAG) was based on pseudo-  
93 transitions (the precursor and product ion are same) as identifying different species of  
94 TAG is challenging<sup>21,30,31</sup>.

95  
96 In *scheduled* MRM, the retention time window assigned is primarily of fixed width.  
97 However, as the retention time window width varies for each lipid species, a variable  
98 window width for each lipid species could reduce the time necessary to develop high  
99 throughput targeted methods. There are a few reports where variable retention time  
100 window (dynamic MRM) has been used in various applications, including identifying  
101 lipids of a specific class<sup>32-38</sup>. However, none of these studies involved comprehensive  
102 lipidome analysis. Further, in these studies, the dwell time for each peak was  
103 automatically fixed based on the RT window width chosen. The quality of peaks can be

104 improved by varying dwell time weightage for each transition without compromising with  
105 the cycle time ([https:// https://sciex.com/](https://sciex.com/)). Assigning a low dwell time weightage to high  
106 abundant compounds and high dwell time weightage to less abundant compounds,  
107 irrespective of the elution window, may help in accommodating large number of  
108 transitions in a single run with improved data quality.

109 Leveraging the combinatorial optimization of *scheduled*-MRM, variable RT window and  
110 dwell time weightage, we report a rapid and sensitive targeted lipidomics method  
111 capable of identifying more than 1000 lipid species, including isomers of triglycerides,  
112 diglycerides, and phospholipids in a single MS run-time of 24 minutes. To the best of  
113 our knowledge, this is the largest number of lipid species identified till date in a single  
114 experiment.

115 We further, exploited this method to quantitate isomer specific different lipid classes in  
116 vitamin B<sub>12</sub> deficiency in the context of Indian population. Previously, we have shown  
117 that vitamin B<sub>12</sub> deficiency alters the lipid metabolism to drive cardiometabolic  
118 phenotype in rats<sup>39</sup>. This study clearly demonstrates the effects of vitamin B<sub>12</sub> deficiency  
119 with changes in the specific lipidomic isomers, laying the foundation to understand the  
120 development of highly prevalent cardio-metabolic diseases in a strictly vegetarian diet  
121 adhered country like India.

## 122 **Results:**

123 We developed a *scheduled*-MRM method that can identify more than 1000 lipid species  
124 in a single mass spectrometric acquisition using a combination of variable-RTW and  
125 relative-DTW for each lipid species along with an optimized LC-gradient. Initially, we  
126 generated a theoretical MRM library using LIPIDMAPS (<http://www.lipidmaps.org/>) which  
127 consisted of 1224 lipid species and 12 internal standards, belonging to the 18 lipid  
128 classes. The total ion chromatogram is shown in figure 1a. The 18 classes of lipids were  
129 analyzed in the positive or negative ion modes. In the positive ion mode, the M+H  
130 precursor ions were used for SM, Cer, CE, while for neutral lipids (TAG, DAG, and  
131 MAG) [M+NH<sub>4</sub>] precursor ions were considered. Phospholipids (PL's) were identified in  
132 negative ion mode, forming [M-H] precursor ion except LPC's and PC's, for which  
133 [M+CH<sub>3</sub>COO]<sup>-</sup> were considered.

134 The variable-RTW and relative-DTW for different species was determined based on the  
135 intensity and width of the peaks obtained for each lipid species. For instance, in positive  
136 ion mode, SM (18:1) had a broader elution window (36.1 seconds) compared to CE  
137 (24:0) (32.5 seconds), but the signal intensity of CE (24:0) was lower as compared to  
138 SM (18:1). Thus, to collect sufficient number of data points, higher dwell time weight of  
139 3.01 was applied for CE (24:0) as compared to 1.00 for SM (18:1) (figure 1b and 1c).  
140 Furthermore, LPC (20:4) and LPE (22:5), had the same elution window of 40.2 seconds  
141 but a dwell time weightage of 1 was applied for LPC (20:4) as compared to 1.15 for LPE

142 (22:5; figure 1d and 1e). A complete list of all parameters for each lipid species along  
143 with retention window and dwell weightage is given in supplementary table 1.

144

### 145 **Identification of isomers within lipid classes**

146 In an attempt to identify different lipid isomers, we used customized-approaches for  
147 various lipid classes. For TAGs, instead of using pseudo-transitions, we identified  
148 different isomers of TAG species on the basis of *sn*-position by selecting a unique  
149 parent ion/ daughter ion (Q1/Q3) combination, which is based on neutral loss of one of  
150 the *sn*-position fatty acyl chain (RCOOH) and NH<sub>3</sub> from parent ion [M+NH<sub>4</sub>]<sup>+</sup>. For  
151 instance, the parent ion (Q1) for TAG 52:6 is 868.8 while the product ion (Q3) was  
152 derived from the remaining mass of TAG after loss of fatty acid present at one of the *sn*-  
153 position like m/z 595.5 for TAG (52:6/FA16:0) as shown in figure 2. Using this approach,  
154 we found 9 isomers for TAG species (52:6) based on composition of fatty acid present  
155 at one of the *sn*-position (figure 2a). Furthermore, MS/MS through EPI scan confirmed  
156 six of the 9 isomers of TAG 52:6 unambiguously (supplementary figure 1). The MRM  
157 library used, consists of 445 TAG species which belongs to 96 different categories of  
158 TAG based on total chain length and unsaturation. Further validation of Q3 in MS/MS  
159 experiment through IDA-EPI scan confirmed the structural characterization of Q3 ion  
160 with MS/MS spectrum for 349 putative TAG species. Using this method, we were able  
161 to identify total of 415 TAG species from 90 different categories of TAG (figure 3a).  
162 Among these 90 TAG's, we found TAG (52:3) was the most abundant form in human  
163 plasma (figure 3b and supplementary table 2). We identified 11 isomers of TAG (52:3)  
164 among which TAG (52:3/FA16:0) was the most abundant in human plasma (figure 3b  
165 and supplementary table 3).

166

167 For phospholipids (PC, PE, PG, PS, PI, and PA), instead of the conventional method of  
168 using the head group loss in positive ion mode (e.g.: PC-38:4, 868.607/184.4), we used  
169 a modified approach using negative ion mode via the loss of fatty acid to identify the  
170 phospholipids at the fatty acid composition level. Using this approach, we were able to  
171 identify isomers of phospholipids within a class, like PC16:0–22:5, PC 18:0–20:5, PC  
172 18:1–20:4 and PC 18:2–20:3 for PC 38:5 (supplementary figure 2a). Further, EPI scan  
173 for MSMS confirmed the fragmented daughter ions for the identification of three PC  
174 (38:5) isomers (supplementary figure 2b,2c and 2d). From the analysis of 455  
175 phospholipids belonging to 6 phospholipid classes (PC, PE, PG, PI, PS, and PA) in the  
176 library, we were able to identify 385 phospholipid species. Among them, phospholipid  
177 (PC, PE, PG, PI, PS, PA) with chain length 36 with 2 unsaturation had the highest  
178 abundance (figure 3c and supplementary table 2). Within PLs, PC 34:2 has highest  
179 abundance (supplementary figure 3 and supplementary table 4). We observed three  
180 isomers of PC 34:2, among which PC (16:0/18:2) was the most abundant (figure 3d  
181 (supplementary table 3). We were also able to identify isomers of DAG (e.g. DAG  
182 16:1/20:2 and DAG 18:1/18:2) (supplementary table 3). A list of all lipid species with

183 their isomers and abundance in terms of area under the chromatogram is given in  
184 (supplementary table 3).

#### 185 **Method validation:**

#### 186 **Limit of blank (LoB), limit of detection (LoD), limit of quantitation (LoQ), and linear** 187 **range.**

188 The raw analytical signal in blank was considered for establishing the LoB, which was  
189 determined from the area under the chromatogram for the selected transition of each  
190 lipid standards (supplementary table 5). The LoD and LoQ were obtained from the raw  
191 analytical signal (area under the chromatogram) obtained by progressively diluting the  
192 lipid standards. The LoD and LoQ were based on the average values obtained in 3  
193 replicates, reflecting inter day variability as mentioned in the materials and methods  
194 section. A representative graph of LoD and LoQ for SM (positive mode) and PC  
195 (negative mode) is shown in figure 4a and 4b and table 1, while the values of LoD and  
196 LoQ for all the species are provided in table 1. The LoDs for all lipid classes were in  
197 range of 0.245 pmol/L – 41.961 pmol/L except for DAG (1 nmol/L). Detection limit for  
198 SM, LPC, PE, and PG were found to be in femtomolar range, while the rest were in  
199 picomolar range. The lowest LoQ was detected for PG- 0.291 pmol/L and highest for  
200 DAG- 2 nmol/L.

201 The linearity of the method was checked by defining the relationship between raw  
202 values of analytical signal for each lipid standard and its concentration in presence of  
203 matrix (plasma). The linear range was determined by checking the performance limit  
204 from LoQ to the highest end of the concentration; based on the coefficient of  
205 determination ( $R^2$ ) value (table 1).

#### 206 **Spike and recovery and coefficient of variation**

207 To determine the percent recovery of all the lipid species, a known amount of lipid  
208 standards were added to plasma (matrix) before or after (spike) extraction of the lipids  
209 from the plasma. The raw area signals obtained from these two conditions were  
210 compared to determine the percentage recovery. These experiments were performed  
211 on three different days and the average percent recovery of the lipid standards is  
212 provided in figure 5a and supplementary table 6.

213 To determine the coefficient of variation of all the lipid species, we extracted lipids from  
214 plasma pooled from 5 individuals. For intra batch variations, the same sample was  
215 subjected to mass spectrometric analysis 5 times. The coefficient of variation was  
216 calculated after sum normalization of raw values obtained within each class. To obtain  
217 the inter day variability; lipids were extracted from the same sample on 3 different days.  
218 A total of 1018, 952, 986 lipid species were detected on day 1, day 2, and day 3  
219 respectively. The median CV of all the identified lipids on three different days was  
220 15.1%, 15.5%, and 14.7% respectively. On day 1 out of 1018 lipid species, we observed  
221 809 lipid species with CV below 30%. Of these, 259 had CV <10% and 665 had CV <  
222 20% (figure 5b). We observed 737 and 773 lipids species on day 2 and day 3



223 respectively with CV<30%. In total we identified 849 lipid species with CV<30% in  
224 either of the three days, out of which 586 lipid species has been consistently detected in  
225 all days with CV<30%. The detailed table with CV for individual lipid species observed  
226 on 3 different days is given in supplementary table 7.

227  
228

## 229 **Lipidomics study in normal and vitamin B12 deficient human plasma**

230 Vitamin B<sub>12</sub>, is a micronutrient mainly sourced from animal products, deficiency of which  
231 has been reported to result in lipid imbalance<sup>39</sup>. Using this method, we attempted to  
232 identify lipid species that are altered due to vitamin B12 deficiency. There was no  
233 significant alteration in any of the lipid classes when taken as a whole between the two  
234 groups (supplementary table 8). Importantly, when individual lipid species within the  
235 classes were compared, we found that lipid species containing one of the types of  
236 omega 3 fatty acid (FA 20:5) was significantly low in plasma of vitamin B12 deficient  
237 individuals (figure 6a). This highlights the use of such a sensitive MS based-method to  
238 uncover subtle differences. In total 6 lipid species containing 20:5 fatty acids were  
239 down-regulated significantly, two of TAG and PC, one each from PE and PA.  
240 Additionally, lipid species containing a omega 6 fatty acid (FA 18:2) was significantly  
241 high in vitamin B12 deficient condition (figure 6b, supplementary table 9). These results  
242 hint at the possibility of lower  $\omega$ -3:  $\omega$ -6 ratio in vitamin B12 deficient individuals.

## 243 **Discussion:**

244  
245 Lipids in general are known to be associated with the pathogenesis of various complex  
246 diseases<sup>10</sup>. However, the exact role played by each lipid species has not been studied  
247 in detail majorly due to the limitation in identifying individual lipid species in a large scale  
248 approach. We report a single extraction, targeted mass spectrometric method using  
249 Amide-HILIC-chromatography (scheduled MRM with variable-RTW and relative-DTW)  
250 which detects more than 1000 lipid species from 18 lipid classes including various  
251 isomers in a single MS run-time of just 24 minutes per sample injection. This method  
252 covers most of the lipid species present in human plasma with 14-22 carbons atoms  
253 and 0-6 double bonds in fatty acid chain, could enabled us to identify considerably  
254 higher number of lipid species than those reported in previous large-scale lipidomics  
255 studies<sup>14,21,40-42</sup>.

256  
257 In this method, the MRM transitions were monitored in a particular time segment, rather  
258 than performing scans for all the lipid species during the entire run. This strategy  
259 reduces the time required for identification of the multiple transitions. We improved the  
260 coverage by additionally optimizing the assigned dwell time weightage for each lipid  
261 species, which is required especially for medium and low abundant lipid species. The  
262 dwell time for each lipid species was customized and the dwell weightage was  
263 optimized based on lipid species abundance without affecting the target scan time in  
264 each cycle. This improved peak quality with good reproducibility.

265

266 Current methods for large-scale lipid analysis can only identify the lipid classes and total  
267 fatty acyl composition of lipid species but the structure specificity is critical for studying  
268 the biological function of lipid species. Finding the composition of fatty acyl chain with  
269 respect to *sn*-position is a major limitation in large scale lipidomics studies<sup>21,30</sup>. Using  
270 pseudo-transitions for identifying TAG has its own disadvantages<sup>21</sup>. Firstly, it is based  
271 on same Q1 and Q3 m/z value (eg: 868.8/868.8), other compound which has same  
272 parent mass (Q1) and similar polarity, will also be eluted at same time and MS cannot  
273 differentiate between two compounds. So scanning unique pair of Q1/Q3 transition,  
274 where Q1 is parent ion and Q3 is characteristic daughter ion, for that compound is  
275 essential. Secondly, isomers cannot be detected as Q3 is same as Q1. Recently using  
276 a combination of photochemical reaction (Ozone-induced dissociation and ultraviolet  
277 photo-dissociation) with tandem MS, Cao et al. reported the identification of isomers for  
278 TAGs and PLs on the basis of *sn*-position and carbon-carbon double bond (C=C)<sup>43</sup>.  
279 Their identification also revealed the sequential loss of different fatty acyl chain based  
280 on *sn*-position, disclosing identification of different positional isomers<sup>43</sup>. However, a  
281 single step identification of TAG isomers in large scale studies remains a challenge due  
282 to the three fatty acyl chains with glycerol backbone, bearing no easily ionizable  
283 moiety<sup>21,30</sup>. We have focused on identification of structural isomers based on *sn*-position  
284 using LC-MS platform, without adding extra step to burden the analysis time and effort.  
285 We were able to detect structural isomers with respect to fatty acyl chain at *sn*-position  
286 where the neutral loss of one of the *sn*-position fatty acyl chain (RCOOH) and NH<sub>3</sub> from  
287 parent ion (M+NH<sub>4</sub><sup>+</sup>) makes their detection possible. Detection was purely based on  
288 assigning a unique combination of Q1/Q3 for structural isomer of TAG species (figure  
289 2a); however, one of the limitations of this method is the inability to assign fatty acyl  
290 group (*sn*1, *sn*2, or *sn*3) to their respective *sn*-position. Hence, the three fatty acyl  
291 chains are represented by the adding the number of carbon atoms and unsaturation  
292 level (e.g., TAG (52:6) and the identified fatty acid at one of the *sn*-position (e.g., FA-  
293 14:0) is represented by TAG (52:6/FA14:0).

294 The LoD for various lipid species in our method was between 0.245 fmol/L – 41.96  
295 pmol/L which was better than or similar to previously reported LoD utilizing different LC-  
296 MS platforms<sup>21,27,31,41,42</sup> and similar to a previously reported large scale lipidomics  
297 method using supercritical fluid-scheduled MRM (5–1,000 fmol/L)<sup>21</sup>. The LoQ in  
298 previously reported methods were in between nmol to μmol/L range while we have  
299 observed much lower LoQs (0.291 pmol/L to 167.84 pmol/L)<sup>21</sup>. Apart from this, the  
300 calculation of limits was based on mean raw analytical signal and SD, which gives  
301 better idea about the method, without any false detection hope (or lower detection  
302 limits). In our method, DAG has highest LoD and LoQ of 1 nmol/L and 2nmol/L  
303 respectively, which was still lower as compared to the previously reported methods for  
304 targeted analysis<sup>21</sup>. The linearity of our method was found to be comparable to previous  
305 lipidomics methods<sup>21,27,41</sup>.



306 The recovery of lipid species in our method was in the range of 69.75 % - 113.19 %,  
307 except DAG - 137.5%, which were within the generally accepted range for quantification  
308 and is comparable with other lipidomics studies<sup>21,27</sup>.

309 A major challenge in lipidomics experiments have been the high variability in the signals  
310 and even the “shared reference materials harmonize lipidomics across MS-based  
311 detection platforms and laboratories” have shown that most lipid species showed large  
312 variability (CV) between 30% to 80%<sup>44</sup>. However variability for endogenous lipid species  
313 that were normalized to the corresponding stable isotope-labelled analogue were lower  
314 than 30%<sup>40,44</sup>. In this method, we used sum normalization (although we are not  
315 addressing batch effect in this study) and found that 849 lipid species had a CV <30%<sup>40</sup>.  
316 Overall, the median CV of our method (15.1%, 15.5%, and 14.7%), was similar to or  
317 better than the previous reports<sup>21,27,31</sup>. In addition, we have also reported species-  
318 specific CV. It should be noted that most of the large scale lipidomics studies previously  
319 done reports the median or average CV of the method but not the species-specific  
320 CV<sup>14,21,27,31</sup>.

### 321 **Lipidomics study in normal and vitamin B<sub>12</sub> deficient human plasma-**

322 Using the method developed we identified lipid species that are altered in individuals  
323 with vitamin B<sub>12</sub> deficiency. Vitamin B<sub>12</sub> is a cofactor of methyl malonyl CoA mutase and  
324 controls the transfer of long-chain fatty acyl-CoA into the mitochondria<sup>45</sup>. Deficiency of  
325 vitamin B<sub>12</sub> results in accumulation of methylmalonyl CoA increasing lipogenesis via  
326 inhibition of beta-oxidation.

327 In the last decade, several studies revealed that vitamin B<sub>12</sub> deficiency causes  
328 alteration in the lipid profile through changes in lipid metabolism, either by modulating  
329 their synthesis or its transport<sup>46</sup>. In particular, the effects of vitamin B<sub>12</sub> on omega 3 fatty  
330 acid and phospholipid metabolism have received much attention. Khaire A et al., found  
331 that vitamin B<sub>12</sub> deficiency increased cholesterol levels but reduced docosahexaenoic  
332 acid (DHA-omega 3)<sup>47</sup>. An imbalance in maternal micronutrients (folic acid, vitamin B<sub>12</sub>)  
333 in Wistar rats increased maternal oxidative stress, decreases placental and pup brain  
334 DHA levels, and decreases placental global methylation levels<sup>48,49</sup>. Although various  
335 studies have shown that B<sub>12</sub> deficiency results in adverse lipid profile as well as  
336 pathophysiological changes linked to CAD, type 2 diabetes mellitus and atherosclerosis,  
337 very few studies have independently investigated the effect of vitamin B<sub>12</sub> status on  
338 changes in human plasma lipid among apparently healthy population<sup>50-52</sup>. Importantly  
339 the lipid species that are altered because of the vitamin deficiency are still not yet well  
340 understood.

341 To our knowledge, this is the first study to identify lipids with a significantly decreased  
342 ω-3 fatty acid (20:5) chains and increased ω-6 (18:2) chains, which might  
343 alter/increased ω-6 to ω-3 fatty acid ratio in human plasma in relation to vitamin B<sub>12</sub>  
344 deficiency and may promote development of many chronic diseases. Most importantly  
345 we found that although there was no significant alteration in the lipid classes, individual

346 lipid species varied in vitamin B<sub>12</sub> deficient individuals clearly demonstrating the utility of  
347 identifying lipid species.

348 The application of scheduled MRM with variable-RTW and relative-DTW enabled large-  
349 scale quantification of lipid species in a single-run as compared to  
350 unscheduled/scheduled/dynamic MRM. With this combinatorial approach, we were able  
351 to detect more than 1000 lipid species in plasma, including isomers of TAG, DAG and  
352 PL's. Additionally we validated the retention time through MSMS analysis in IDA-EPI  
353 scan mode by matching fragmented daughter ion from MSMS spectrum to putative lipid  
354 species structure. It should be noted that the MRMs currently used were specific for  
355 plasma and may not be ideal for other biological systems. Therefore, for developing a  
356 separate MRM panel may be required for each system. To the best of our knowledge  
357 this is the largest number of lipid species identified till date in a single experiment. A  
358 comprehensive identification of structural isomers in large-scale lipid method proves to  
359 be critical for studying the important biological functions of lipids.

360

## 361 **Acknowledgement**

362 The authors would like to thank Dr. Mainak Dutta from BITS Dubai, Mrs. Akanksha  
363 Singh and Dr. Christei Hunter of Sciex for their invaluable inputs and suggestions in  
364 shaping this study. Akash Kumar Bhaskar and Salwa Naushin would like to thank CSIR  
365 for their fellowship. The study was funded by Council of Scientific and Industrial  
366 Research (CARDIOMED MLP 0122 and MLP 1811).

## 367 **References**

- 368 1 Smilowitz, J. T. *et al.* Nutritional lipidomics: molecular metabolism, analytics, and diagnostics.  
369 *Molecular nutrition & food research* **57**, 1319-1335 (2013).
- 370 2 Muro, E., Atilla-Gokcumen, G. E. & Eggert, U. S. Lipids in cell biology: how can we understand  
371 them better? *Molecular biology of the cell* **25**, 1819-1823 (2014).
- 372 3 Yáñez-Mó, M. *et al.* Biological properties of extracellular vesicles and their physiological  
373 functions. *Journal of extracellular vesicles* **4**, 27066 (2015).
- 374 4 Van Meer, G., Voelker, D. R. & Feigenson, G. W. Membrane lipids: where they are and how they  
375 behave. *Nature reviews Molecular cell biology* **9**, 112-124 (2008).
- 376 5 Glomset, J. A. Protein-lipid interactions on the surfaces of cell membranes. *Curr. Opin. Struct.*  
377 *Biol* **9**, 425-427 (1999).
- 378 6 Ye, R., Onodera, T. & Scherer, P. E. Lipotoxicity and  $\beta$  cell maintenance in obesity and type 2  
379 diabetes. *Journal of the Endocrine Society* **3**, 617-631 (2019).
- 380 7 Fu, S. *et al.* Aberrant lipid metabolism disrupts calcium homeostasis causing liver endoplasmic  
381 reticulum stress in obesity. *Nature* **473**, 528-531 (2011).

- 382 8 Yang, M., Zhang, Y. & Ren, J. Autophagic regulation of lipid homeostasis in cardiometabolic  
383 syndrome. *Frontiers in cardiovascular medicine* **5**, 38 (2018).
- 384 9 Beloribi-Djefafli, S., Vasseur, S. & Guillaumond, F. Lipid metabolic reprogramming in cancer  
385 cells. *Oncogenesis* **5**, e189-e189 (2016).
- 386 10 Wymann, M. P. & Schneider, R. Lipid signalling in disease. *Nature reviews Molecular cell biology*  
387 **9**, 162-176 (2008).
- 388 11 Quehenberger, O. & Dennis, E. A. The human plasma lipidome. *New England Journal of Medicine*  
389 **365**, 1812-1823 (2011).
- 390 12 Shevchenko, A. & Simons, K. Lipidomics: coming to grips with lipid diversity. *Nature reviews*  
391 *Molecular cell biology* **11**, 593-598 (2010).
- 392 13 Sud, M. *et al.* Lmsd: Lipid maps structure database. *Nucleic acids research* **35**, D527-D532 (2007).
- 393 14 Pradas, I. *et al.* Lipidomics reveals a tissue-specific fingerprint. *Frontiers in physiology* **9**, 1165  
394 (2018).
- 395 15 van Meer, G. Cellular lipidomics. *The EMBO journal* **24**, 3159-3165 (2005).
- 396 16 Brügger, B., Erben, G., Sandhoff, R., Wieland, F. T. & Lehmann, W. D. Quantitative analysis of  
397 biological membrane lipids at the low picomole level by nano-electrospray ionization tandem  
398 mass spectrometry. *Proceedings of the National Academy of Sciences* **94**, 2339-2344 (1997).
- 399 17 Wu, Z., Shon, J. C. & Liu, K.-H. Mass spectrometry-based lipidomics and its application to  
400 biomedical research. *Journal of lifestyle medicine* **4**, 17 (2014).
- 401 18 Wenk, M. R. The emerging field of lipidomics. *Nature reviews Drug discovery* **4**, 594-610 (2005).
- 402 19 Han, X. & Gross, R. W. Global analyses of cellular lipidomes directly from crude extracts of  
403 biological samples by ESI mass spectrometry a bridge to lipidomics. *Journal of lipid research* **44**,  
404 1071-1079 (2003).
- 405 20 Kirkwood, J. S., Maier, C. & Stevens, J. F. Simultaneous, untargeted metabolic profiling of polar  
406 and nonpolar metabolites by LC-Q-TOF Mass Spectrometry. *Current protocols in toxicology* **56**,  
407 4.39. 31-34.39. 12 (2013).
- 408 21 Takeda, H. *et al.* Widely-targeted quantitative lipidomics method by supercritical fluid  
409 chromatography triple quadrupole mass spectrometry. *Journal of lipid research* **59**, 1283-1293  
410 (2018).
- 411 22 Contrepois, K. *et al.* Cross-platform comparison of untargeted and targeted lipidomics  
412 approaches on aging mouse plasma. *Scientific reports* **8**, 1-9 (2018).
- 413 23 Khan, M. J. *et al.* Evaluating a targeted multiple reaction monitoring approach to global  
414 untargeted lipidomic analyses of human plasma. *Rapid Communications in Mass Spectrometry*  
415 **34**, e8911 (2020).
- 416 24 Dekker, B. Reduce complexity by choosing your reactions. *Nature Methods* **12**, 16-16 (2015).
- 417 25 Mao, C. *et al.* Cloning and Characterization of a Mouse Endoplasmic Reticulum Alkaline  
418 Ceramidase AN ENZYME THAT PREFERENTIALLY REGULATES METABOLISM OF VERY LONG CHAIN  
419 CERAMIDES. *Journal of Biological Chemistry* **278**, 31184-31191 (2003).
- 420 26 Song, J. *et al.* A highly efficient, high-throughput lipidomics platform for the quantitative  
421 detection of eicosanoids in human whole blood. *Analytical biochemistry* **433**, 181-188 (2013).
- 422 27 Weir, J. M. *et al.* Plasma lipid profiling in a large population-based cohort. *Journal of lipid*  
423 *research* **54**, 2898-2908 (2013).
- 424 28 Zhang, W. *et al.* Online photochemical derivatization enables comprehensive mass  
425 spectrometric analysis of unsaturated phospholipid isomers. *Nature communications* **10**, 1-9  
426 (2019).
- 427 29 Thomas, M. C., Mitchell, T. W. & Blanksby, S. J. Ozonolysis of phospholipid double bonds during  
428 electrospray ionization: A new tool for structure determination. *Journal of the American*  
429 *Chemical Society* **128**, 58-59 (2006).

- 430 30 Baba, T., Campbell, J. L., Le Blanc, J. Y. & Baker, P. R. Structural identification of triacylglycerol  
431 isomers using electron impact excitation of ions from organics (EIEIO). *Journal of lipid research*  
432 **57**, 2015-2027 (2016).
- 433 31 Tabassum, R. *et al.* Genetic architecture of human plasma lipidome and its link to cardiovascular  
434 disease. *Nature communications* **10**, 1-14 (2019).
- 435 32 Li, J. *et al.* Large-scaled human serum sphingolipid profiling by using reversed-phase liquid  
436 chromatography coupled with dynamic multiple reaction monitoring of mass spectrometry:  
437 method development and application in hepatocellular carcinoma. *Journal of chromatography A*  
438 **1320**, 103-110 (2013).
- 439 33 Liang, J. *et al.* A dynamic multiple reaction monitoring method for the multiple components  
440 quantification of complex traditional Chinese medicine preparations: Niu Huang Shangqing pill as  
441 an example. *Journal of Chromatography a* **1294**, 58-69 (2013).
- 442 34 Rao, Z. *et al.* Development of a dynamic multiple reaction monitoring method for determination  
443 of digoxin and six active components of Ginkgo biloba leaf extract in rat plasma. *Journal of*  
444 *Chromatography B* **959**, 27-35 (2014).
- 445 35 Andrade, G. *et al.* Liquid chromatography–electrospray ionization tandem mass spectrometry  
446 and dynamic multiple reaction monitoring method for determining multiple pesticide residues in  
447 tomato. *Food chemistry* **175**, 57-65 (2015).
- 448 36 Jia, Z.-X., Zhang, J.-L., Shen, C.-P. & Ma, L. Profile and quantification of human stratum corneum  
449 ceramides by normal-phase liquid chromatography coupled with dynamic multiple reaction  
450 monitoring of mass spectrometry: development of targeted lipidomic method and application to  
451 human stratum corneum of different age groups. *Analytical and bioanalytical chemistry* **408**,  
452 6623-6636 (2016).
- 453 37 Shah, I., Petroczi, A., Uvacsek, M., Ránky, M. & Naughton, D. P. Hair-based rapid analyses for  
454 multiple drugs in forensics and doping: application of dynamic multiple reaction monitoring with  
455 LC-MS/MS. *Chemistry Central Journal* **8**, 73 (2014).
- 456 38 Xu, G., Amicucci, M. J., Cheng, Z., Galermo, A. G. & Lebrilla, C. B. Revisiting monosaccharide  
457 analysis–quantitation of a comprehensive set of monosaccharides using dynamic multiple  
458 reaction monitoring. *Analyst* **143**, 200-207 (2018).
- 459 39 Kumar, K. A. *et al.* Maternal dietary folate and/or vitamin B12 restrictions alter body  
460 composition (adiposity) and lipid metabolism in Wistar rat offspring. *The Journal of nutritional*  
461 *biochemistry* **24**, 25-31 (2013).
- 462 40 Medina, J. *et al.* Single-Step Extraction Coupled with Targeted HILIC-MS/MS Approach for  
463 Comprehensive Analysis of Human Plasma Lipidome and Polar Metabolome. *Metabolites* **10**,  
464 495 (2020).
- 465 41 Rampler, E. *et al.* Simultaneous non-polar and polar lipid analysis by on-line combination of  
466 HILIC, RP and high resolution MS. *Analyst* **143**, 1250-1258 (2018).
- 467 42 Schoeny, H. *et al.* Preparative supercritical fluid chromatography for lipid class fractionation—a  
468 novel strategy in high-resolution mass spectrometry based lipidomics. *Analytical and*  
469 *bioanalytical chemistry*, 1-10 (2020).
- 470 43 Cao, W. *et al.* Large-scale lipid analysis with C=C location and sn-position isomer resolving  
471 power. *Nature communications* **11**, 1-11 (2020).
- 472 44 Triebl, A. *et al.* Shared reference materials harmonize lipidomics across MS-based detection  
473 platforms and laboratories. *Journal of lipid research* **61**, 105-115 (2020).
- 474 45 Green, R. *et al.* Vitamin B 12 deficiency. *Nature reviews Disease primers* **3**, 1-20 (2017).
- 475 46 Saraswathy, K. N., Joshi, S., Yadav, S. & Garg, P. R. Metabolic distress in lipid & one carbon  
476 metabolic pathway through low vitamin B-12: a population based study from North India. *Lipids*  
477 *in health and disease* **17**, 96 (2018).

- 478 47 Khaire, A., Rathod, R., Kale, A. & Joshi, S. Vitamin B12 and omega-3 fatty acids together regulate  
479 lipid metabolism in Wistar rats. *Prostaglandins, Leukotrienes and Essential Fatty Acids* **99**, 7-17  
480 (2015).
- 481 48 Kulkarni, A. *et al.* Effects of altered maternal folic acid, vitamin B 12 and docosahexaenoic acid  
482 on placental global DNA methylation patterns in Wistar rats. *PLoS One* **6**, e17706 (2011).
- 483 49 Roy, S. *et al.* Maternal micronutrients (folic acid and vitamin B12) and omega 3 fatty acids:  
484 implications for neurodevelopmental risk in the rat offspring. *Brain and Development* **34**, 64-71  
485 (2012).
- 486 50 Adaikalakoteswari, A. *et al.* Vitamin B12 deficiency is associated with adverse lipid profile in  
487 Europeans and Indians with type 2 diabetes. *Cardiovascular diabetology* **13**, 129 (2014).
- 488 51 Kumar, J. *et al.* Vitamin B12 deficiency is associated with coronary artery disease in an Indian  
489 population. *Clinical Chemistry and Laboratory Medicine (CCLM)* **47**, 334-338 (2009).
- 490 52 Mahalle, N., Kulkarni, M. V., Garg, M. K. & Naik, S. S. Vitamin B12 deficiency and  
491 hyperhomocysteinemia as correlates of cardiovascular risk factors in Indian subjects with  
492 coronary artery disease. *Journal of cardiology* **61**, 289-294 (2013).
- 493 53 Armbruster, D. A. & Pry, T. Limit of blank, limit of detection and limit of quantitation. *The clinical*  
494 *biochemist reviews* **29**, S49 (2008).
- 495 54 Armbruster, D. A., Tillman, M. D. & Hubbs, L. M. Limit of detection (LOD)/limit of quantitation  
496 (LOQ): comparison of the empirical and the statistical methods exemplified with GC-MS assays  
497 of abused drugs. *Clinical chemistry* **40**, 1233-1238 (1994).
- 498 55 Rower, J. E., Bushman, L. R., Hammond, K. P., Kadam, R. S. & Aquilante, C. L. Validation of an  
499 LC/MS method for the determination of gemfibrozil in human plasma and its application to a  
500 pharmacokinetic study. *Biomedical Chromatography* **24**, 1300-1308 (2010).
- 501 56 van Amsterdam, P. *et al.* The European Bioanalysis Forum community's evaluation,  
502 interpretation and implementation of the European Medicines Agency guideline on Bioanalytical  
503 Method Validation. *Bioanalysis* **5**, 645-659 (2013).

504

505

506

507

508

509

510

511

512

513

514



515 **Figure and table:**

516

517 **Figure 1 Chromatograms of the *scheduled* MRM method with variable-RTW and**  
518 **relative-DTW. (a)** A total ion chromatogram of method consisting of 1224 lipid species  
519 and 12 internal standards from 18 lipid classes in positive or negative mode. **b, c** In  
520 positive ion mode, SM (18:1)-729/184.1 has elution window of 36.1 seconds with dwell  
521 weight 1 (**b**) and CE (24:0)-754.7/369.4 has elution window of 32.5 seconds with dwell  
522 weight 3.01 (**c**). **d, e** In negative ion mode, LPC (20:4)-602.3/303.2 and LPE (22:5)-  
523 526.3/329.2 has equal elution window (40.2 seconds) but LPE (22:5) has higher dwell  
524 weight (1.15) (**d**) compared to LPC (20:4) dwell weight (1) (**e**).

525 **Figure 2 XIC (extracted ion chromatogram) of nine isomers of TAG (52:6).** Parent  
526 m/z for all was 868.8 while the product m/z was derived from the remaining mass  
527 (R1+R2 with glycerol backbone) after the loss of fatty acid released from the parent ion.  
528 R1+R2 can be any composition of fatty acid which sum-up to give product ion. Different  
529 color of dot represents different isomers confirmed through IDA-EPI experiment (refer to  
530 supplementary figure 1).

531 **Figure 3 Abundance of different lipids. a** Abundance of different TAGs on the basis  
532 of total chain length (as a function of main-chain carbon atoms) and unsaturation. **b** 415  
533 TAG isomers were detected from 90 different categories of TAG. **c** Abundance of  
534 different phospholipids on the basis of total chain length and unsaturation. **d** Abundance  
535 of 385 phospholipids belonging to 6 classes (PC, PE, PG, PI, PS, and PA), different  
536 dots of same color represent isomers. The abundance of the difference lipids/isomers is  
537 represented by the varying size of the bubble in all the panels.

538 **Figure 4 Representative graphs from positive and negative ion mode showing**  
539 **LoD, LoQ and coefficient of determination, x and y-axis was log transformed. a**  
540 SM from positive ion mode and **b** PC from negative ion mode. The grey area represent  
541 the concentration below the linear range while the yellow region is indicative of linear  
542 range. The error bar represents the variance/standard deviation obtained in 3 replicates,  
543 reflecting inter day variability

544 **Figure 5 Validation of the method. a** Spike and recovery of different lipid classes  
545 where blue bars represent the recovery of lipids when known concentration of lipid  
546 standards was spiked during extraction and green bars represents the reference (same  
547 concentration of lipid standard spiked after extraction). **b** Coefficient of variance on day  
548 1 where 1018 lipid species from 15 lipid classes were detected (n=5). The color scale of  
549 the bubble is based on the function of coefficient of variance in the increasing order.  
550 The right hand panel represents the density function w.r.t. coefficient of variance.



551 **Figure 6 Significantly altered lipid species in vitamin B<sub>12</sub> deficiency. a** Significantly  
 552 down-regulated Omega 3 fatty acid 20:5 in vitamin B12 deficiency. **b** Significantly  
 553 upregulated Omega 6 fatty acid 18:2 in vitamin B12 deficient condition.

554 **Table1. Analytical validation of the method with lipid standards.**Table1.

| Lipid class | Ion mode | Number of lipid species | Internal standard        | LoD Conc. (pmol/L) | LoQ Conc. (pmol/L) | Coefficient of determination (R <sup>2</sup> ) |
|-------------|----------|-------------------------|--------------------------|--------------------|--------------------|------------------------------------------------|
| SM          | ESI+     | 12                      | SM (d18:1-18:1(d9))      | 0.319              | 0.639              | 0.99                                           |
| CE          | ESI+     | 21                      | Ceramide (17:0)          | 6.082              | 12.164             | 0.99                                           |
| Cer         | ESI+     | 62                      |                          |                    |                    |                                                |
| TAG         | ESI+     | 445                     | TAG (15:0-18:1(d7)-15:0) | 17.233             | 34.466             | 0.99                                           |
| DAG         | ESI+     | 50                      | DAG (15:0-18:1(d7))      | 999.184            | 1998.367           | 0.99                                           |
| MAG         | ESI+     | 17                      |                          |                    |                    |                                                |
| LPC         | ESI-     | 16                      | LPC (18:1(d7))           | 0.368              | 5.887              | 0.99                                           |
| PC          | ESI-     | 79                      | PC (15:0-18:1(d7))       | 13.024             | 26.048             | 0.98                                           |
| LPE         | ESI-     | 16                      | LPE (18:1(d7))           | 1.329              | 5.318              | 0.99                                           |
| PE          | ESI-     | 142                     | PE (15:0-18:1(d7))       | 0.245              | 0.979              | 0.99                                           |
| LPG         | ESI-     | 16                      | PG (15:0-18:1(d7))       | 0.291              | 0.291              | 0.99                                           |
| PG          | ESI-     | 78                      |                          |                    |                    |                                                |
| LPI         | ESI-     | 16                      | PI (15:0-18:1(d7))       | 2.639              | 10.557             | 0.98                                           |
| PI          | ESI-     | 77                      |                          |                    |                    |                                                |
| LPS         | ESI-     | 16                      | PS (15:0-18:1(d7))       | 41.961             | 167.846            | 0.99                                           |
| PS          | ESI-     | 78                      |                          |                    |                    |                                                |
| LPA         | ESI-     | 6                       | PA (15:0-18:1(d7))       | 41.897             | 167.587            | 0.97                                           |
| PA          | ESI-     | 77                      |                          |                    |                    |                                                |

555

## 556 **Materials and Methods**

### 557 **Chemicals and reagents**

558 MS-grade acetonitrile, methanol, water, 2-propanol (IPA) and HPLC-grade  
559 dichloromethane (DCM), were purchased from Biosolve (Dieuze, France); ammonium  
560 acetate and ethanol were obtained from Merck (Merck & Co. Inc., Kenilworth, NJ, USA).  
561 Lipid internal standards used in the study : SM (d18:1-18:1(d9)), TAG (15:0-18:1(d7)-  
562 15:0), DAG (15:0-18:1(d7)), LPC (18:1(d7)), PC (15:0-18:1(d7)), LPE (18:1(d7)), PE  
563 (15:0-18:1(d7)), PG (15:0-18:1(d7)), PI (15:0-18:1(d7)), PS (15:0-18:1(d7)), PA (15:0-  
564 18:1(d7)) in the form of Splash mix and ceramide (17:0) were purchased from Avanti  
565 polar (Alabaster, Alabama, USA).

### 566 **Lipid extraction from human plasma**

567 We used a modified *Bligh and Dyer method* using Dichloromethane/methanol/water  
568 (2:2:1 v/v). The study was approved by institutional ethical committee of CSIR-IGIB.  
569 Human plasma (10  $\mu$ L) was mixed with 490  $\mu$ L of water (in glass tube) and incubated on  
570 ice for 10 minutes. Lipid internal standard mixes (5  $\mu$ L, consisting of splashmix and  
571 ceramide) was added to a mixture of methanol (2 mL) and dichloromethane (1 mL); the  
572 mixture was vortexed and allowed to incubate for 30 minutes at room temperature. After  
573 incubation, 500  $\mu$ L water and 1 mL dichloromethane was added to the solution and  
574 vortexed for 5 seconds. The mixture was centrifuged at 300 g for 10 minutes when there  
575 was a phase separation. The lower organic layer was collected into a fresh glass tube. 2  
576 mL dichloromethane was added to remaining mixture in extraction tube and centrifuged  
577 again to collect the lower layer. The previous step was repeated one more time. Solvent  
578 was evaporated in vacuum dryer at 25 °C and the lipids were resuspended in 100 $\mu$ l of  
579 ethanol; vortexed for 5 minutes, sonicated for 10 minutes and again vortexed for 5  
580 minutes. The suspension was transferred to polypropylene auto sampler vials and  
581 subjected to LC-MS run.

### 582 **Liquid chromatography-Mass spectrometry:**

583 We used an Exion LC system with a Waters AQUITY UPLC BEH HILIC XBridge Amide  
584 column (3.5  $\mu$ m, 4.6 x 150 mm) for chromatographic separation. The oven temperature  
585 was set at 35°C and the auto sampler was set at 4°C. Lipids were separated using  
586 buffer A (95% acetonitrile with 10mM ammonium acetate, pH-8.2) and buffer B (50%  
587 acetonitrile with 10mM ammonium acetate, pH-8.2) with following gradient: with a flow  
588 rate of 0.7 ml/minute, buffer B was increased from 0.1% to 6% in 6 minutes, increased  
589 to 25% buffer B in next 4 minutes. In the next 1 minute buffer B was ramped up to 98%,  
590 further increased to 100% in the next 2 minutes, and held at the same concentration  
591 and flow rate for 30 seconds. Flow rate was increased from 0.7 ml/min to 1.5 ml/min  
592 and 100% buffer B was maintained for the next 5.1 minutes. Buffer B was brought to  
593 initial 0.1% concentration in 0.1 minute and column was equilibrated at the same  
594 concentration and flow for 4.3 minutes before flow rate was brought to initial 0.7

595 ml/minute in next 30 seconds and maintained at the same till the end of 24 minutes  
596 gradient. Additionally the separation system was equilibrated for 3 minute for  
597 subsequent runs.

598 Sciex QTRAP 6500+ LC/MS/MS system in low mass range, Turbo source with  
599 Electrospray Ionization (ESI) probe was used with the following parameters; curtain gas  
600 (CUR): 35 psi, temperature (TEM): 500 degree, source gas 1(GS1): 50 and source gas  
601 2 (GS2): 60 psi, ionization voltage (IS): 5500 for positive mode and IS: -4500 for  
602 negative mode, target scan time: 0.5 sec, scan speed: 10 Da/s, settling time: 5.0000  
603 msec and MR pause: 5.0070 msec. Acquisition was done using Analyst 1.6.3 software.

#### 604 **Method development:**

605 For identification and relative quantification of all the lipid species, theoretical MRM  
606 library were generated using LIPIDMAPS (<https://www.lipidmaps.org/>). Using internal  
607 standards from different lipid classes, the MRM parameters (collision energy,  
608 declustering potential, cell exit potential, and entrance potential) were optimized for  
609 1224 lipid species which belonged to 18 lipid classes - sphingomyelin (SM), ceramide  
610 (Cer), cholesterol ester (CE), Monoacylglycerol (MAG), diacylglycerol (DAG),  
611 Triacylglycerol (TAG), lysophosphatidic acid (LPA), phosphatidic acid (PA),  
612 lysophosphatidylcholine (LPC), phosphatidylcholine (PC),  
613 lysophosphatidylethanolamine (LPE), phosphatidylethanolamine (PE),  
614 lysophosphatidylinositol (LPI), phosphatidylinositol (PI), lysophosphatidylglycerol (LPG),  
615 phosphatidylglycerol (PG), lysophosphatidylserine, and (LPS), phosphatidylserine (PS)  
616 (supplementary table- 1).

617 The MRM library consisted of 1236 transitions including 12 internal standards, of which  
618 611 species were identified in positive mode (SM, CE, Cer, TAG, DAG, MAG) and 625  
619 identified in negative mode (Phospholipids and lysophospholipids). The current MRM  
620 panel covers major lipid classes and categories having fatty acids with 14-22 carbons  
621 and 0-6 double bonds per fatty acyl chain. Transitions were distributed into multiple  
622 unscheduled MRM method and the relative retention time of each transition was  
623 determined with respect to their respective internal standards through Amide-HILIC  
624 column. Furthermore, the retention time validation was done by performing MS/MS  
625 experiment using Information dependent acquisition (IDA) with enhanced product ion  
626 scan (EPI) of specific ions in unscheduled MRM for each lipid class. MS/MS analysis in  
627 EPI mode was based on the conventional triple quadrupole ion path property of an ion-  
628 trap for the third quadrupole. The basic parameters were kept the same as mentioned in  
629 MRM experiment. MS/MS spectra were compared with MS/MS information from LIPID  
630 MAPS (<http://www.lipidmaps.org/>) to verify the structures of the putative lipid species and  
631 predicting the structure from MS/MS spectra based on specific cleavage rules for lipids.

632

#### 633 **Retention time window and Dwell time weightage**

634

635 Using *sMRM* Builder ([https:// https://sciex.com/](https://sciex.com/)), an Excel based tool from Sciex, the  
636 variable retention time window and variable dwell time weightage for all transitions were  
637 optimized. The principle on which the tool works is based on the width and intensity of  
638 the chromatographic peak. With variable retention time window width, each MRM  
639 transition can have its own RT window. Wider windows are assigned to analytes that  
640 show higher run to run variation or have broader peak widths. Variable dwell times were  
641 assigned to improve the signal to noise ratio of MRM transitions based on the  
642 abundance of the analyte in the sample- higher dwell time weightage assigned for  
643 analytes with low abundance (supplementary table 1). Dwell time for each species were  
644 assigned based on this weight which maintains the cycle time and optimizes the signal  
645 to noise ratio for low abundant peaks. Detailed for optimized parameters is given in  
646 supplementary table 1.

647

#### 648 **Limit of Detection and Quantitation:**

649 The limits of detection and quantitation were derived from peak area of known amounts  
650 of lipid internal standards added to lipid extract from human plasma (matrix):

651 The master mix of lipid internal standards was prepared from splashmix and ceramide  
652 (17:0) having following concentrations: SM (41.86 nmol), Cer (24.91 nmol), TAG (70.59  
653 nmol), DAG (15.99 nmol), LPC (48.23 nmol), PC (213.38  $\mu$ mol), LPE (10.89 nmol), PE  
654 (8.02 nmol), PG (38.09 nmol), PI (5.40 nmol), PS (10.74 nmol), PA (10.73 nmol).

655 Limit of Blank- was defined as the average (based on triplicate experiments) signal  
656 found only in matrix (without internal standards; blank). LoB was calculated using mean  
657 and standard deviation from plasma matrix:

$$658 \quad \mathbf{LoB = mean\ blank + 1.645(SD\ blank)^{53}}$$

659 The raw analytical signal obtained for standards from plasma lipid extract (spiked with  
660 standards) was used to estimate the LoD and LoQ, using the following formula:

$$661 \quad \mathbf{LoD = mean\ blank + 3(Standard\ Deviation\ blank)^{54}}$$

$$662 \quad \mathbf{LoQ = mean\ blank + 10(Standard\ Deviation\ blank)^{54}}$$

663 The standard solution was diluted serially with matrix and the lipid standards were run in  
664 the following concentration ranges: 319.39 fmol- 41.86 nmol for SM, 190.06 fmol- 24.91  
665 nmol for Cer, 538.53 fmol-70.59 nmol for TAG, 121.97 fmol- 15.99 nmol for DAG,  
666 367.9633086 fmol- 48.23 nmol for LPC, 1.63 pmol- 213.38  $\mu$ mol for PC, 83.09 fmol-  
667 10.89 nmol for LPE, 61.16 fmol- 8.02 nmol for PE, 290.59 fmol- 38.09 nmol for PG,  
668 41.24 fmol- 5.40 nmol for PI, 81.96 fmol- 10.74 nmol for PS, 81.83 fmol- 10.73 nmol for  
669 PA. The lowest concentration which has signal more than the estimated method limits  
670 (based on above formula) was considered as LoD and LoQ. The mean and standard  
671 deviation was calculated from 3 replicates. Linearity was represented by  $R^2$ , where LoQ  
672 was taken as the lowest calibrator concentration for each lipid standards.

673 **Spike and recovery and coefficient of variance:**

674 Extraction recovery for the method was measured by comparing the peak area of matrix  
675 extract spiked with standards before and after extraction. For this, 5uL of lipid internal  
676 standard mix (standard mix: lipid extract resuspension volume :: 1:20 v/v) was used.  
677 The percentage recovery and relative standard deviation was calculated from 3  
678 biological replicates.

679 ***Relative recovery = Mean area of extracted sample with spiked standard before***  
680 ***extraction/ Mean area of extracted sample with spiked standard after extraction***<sup>55</sup>

681 ***%Relative Standard Deviation = Standard Deviation /Mean analytical signal × 100***

682 Coefficient of variance (CV) of the method was determined by observing individual lipid  
683 species variation within batch. The intra-batch variation was assessed by analyzing 5  
684 technical replicates of lipids extracted from pooled plasma. CV values were only  
685 calculated for those lipid species which has carry over less than 20% and present in at  
686 least 3 replicates<sup>56</sup>. Inter day variability for each lipid species was determined by  
687 analyzing lipids on 3 different days from a stock of pooled plasma. The CV values were  
688 reported for 3 different days (n=5, technical replicates) after sum-normalization within  
689 lipid class.

690 ***Percentage CV = standard deviation/average intensity ×100***

691 **Alteration of plasma lipids due to vitamin B12 deficiency:**

692 Study population: The study (which was a part of a larger study), was designed to  
693 identify plasma lipids that were altered due to vitamin B12 deficiency. Apparently  
694 healthy individuals were classified in two groups based on their plasma vitamin B12  
695 levels. An informed consent was obtained from the participants. The study was  
696 approved by institutional ethical committee of CSIR-IGIB. Individuals with vitamin B12  
697 values less than 150 pg/ml, were considered to be vitamin B12 deficient and those with  
698 levels between 400-800 pg/ml were considered be in the normal range. Lipids from  
699 plasma were extracted as described above. For this study, plasma of 95 individuals ( 48  
700 with B12 deficiency and 47 with normal plasma vitamin B12 levels) were used. Lipids  
701 that had a CV<30% and that were altered by more than 1.3 folds with p<0.05 were  
702 considered to be significantly altered between the two groups.

703 ***Data analysis:*** The .wiff files for relative quantitation were processed in MultiQuant 3.0.2  
704 and for the identification of different lipid species; MS/MS spectrum matching with the  
705 structure of putative lipid species using .mol file was done using Peakview 2.0.1.  
706 Statistical analysis was done using Excel. Figures were drawn using MATLAB  
707 (MATLAB, 2010. *version 7.10.0 (R2010a)*), Natick, Massachusetts: The MathWorks  
708 Inc.), Raw graph (<https://rawgraphs.io>) and GraphPad Prism version 6.0.

709  
710





a. Total ion chromatogram

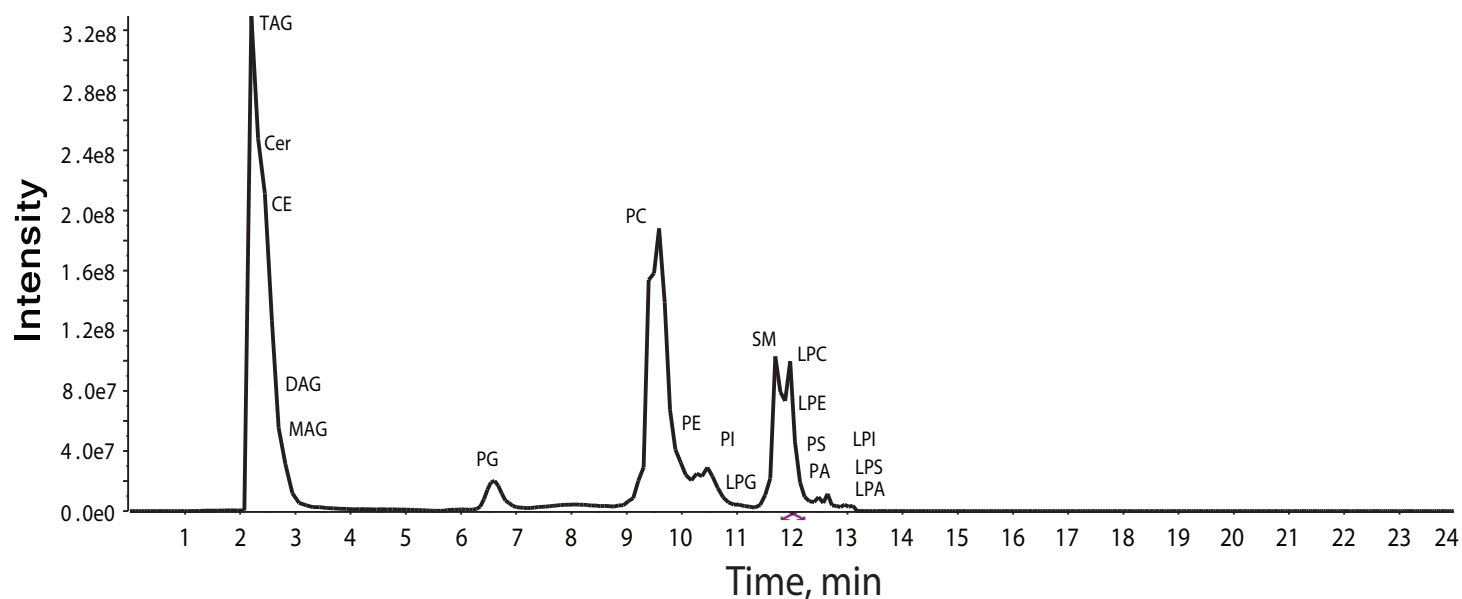

b. S M(18:1) - 7 29.7/184.1

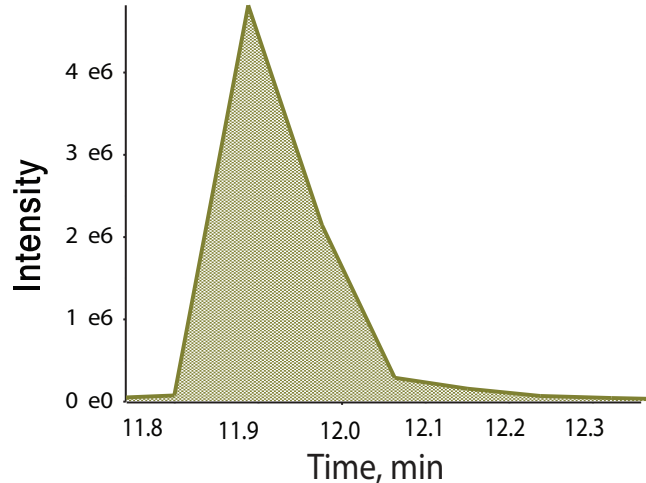

d. L P C (20:4) - 6 02.3 / 30 3.2

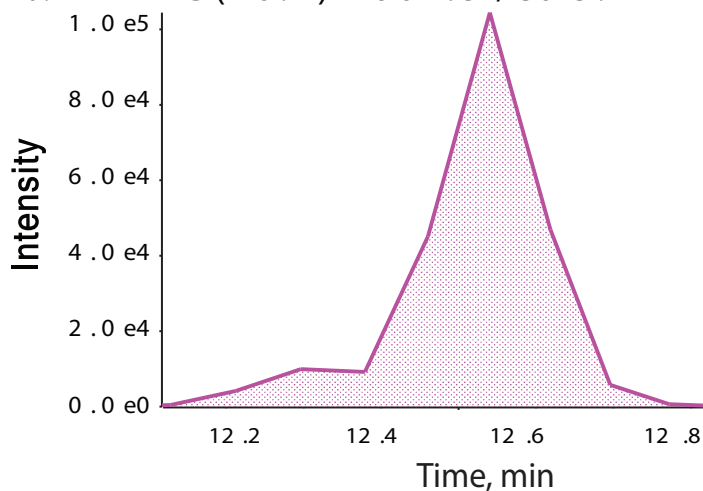

c. C E( 24:0) - 7 54.7/369.4

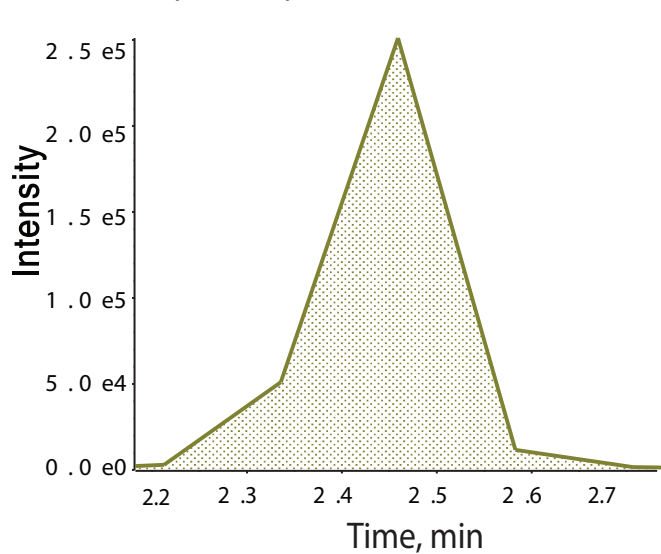

e. L P E( 22:5) - 5 26.3/329.2

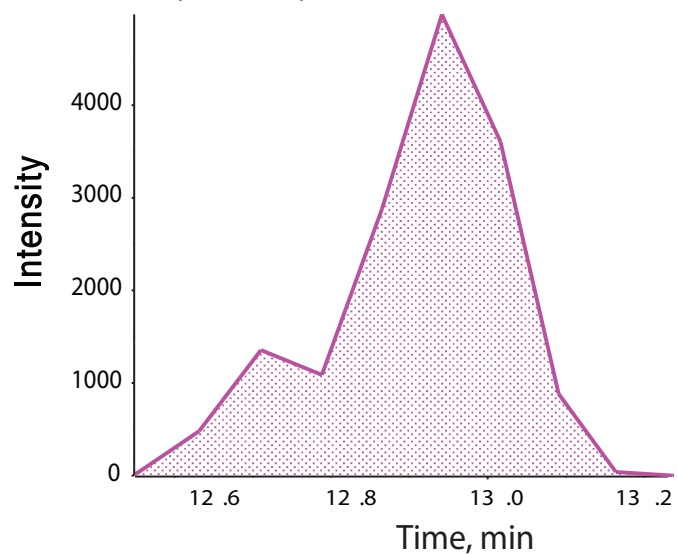

Figure1.

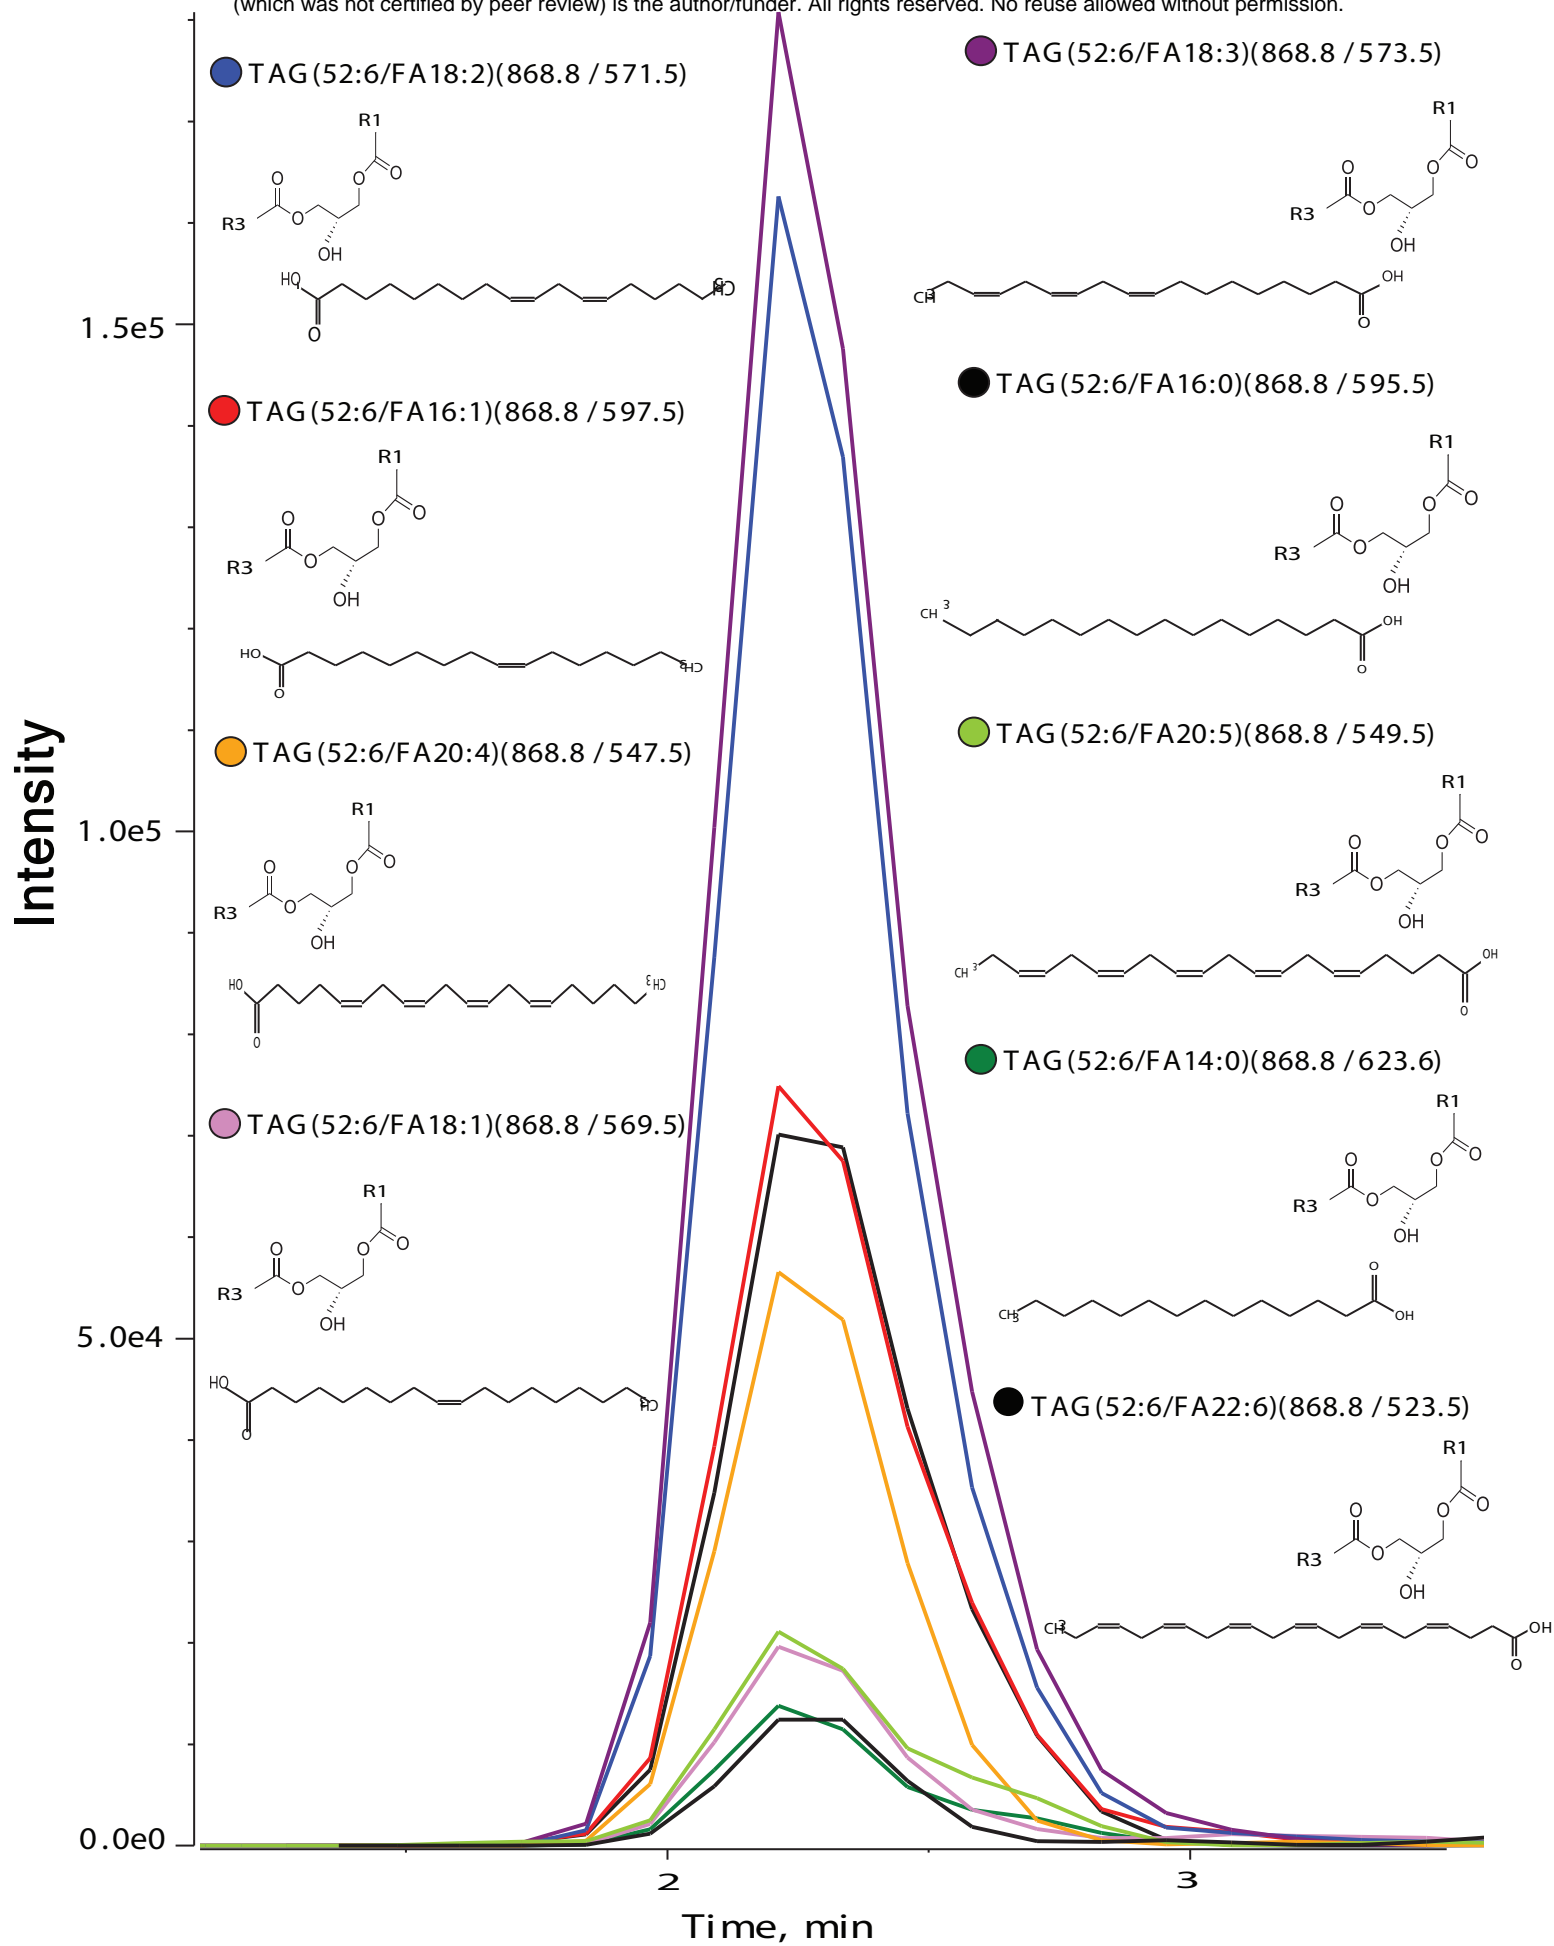

Figure 2.

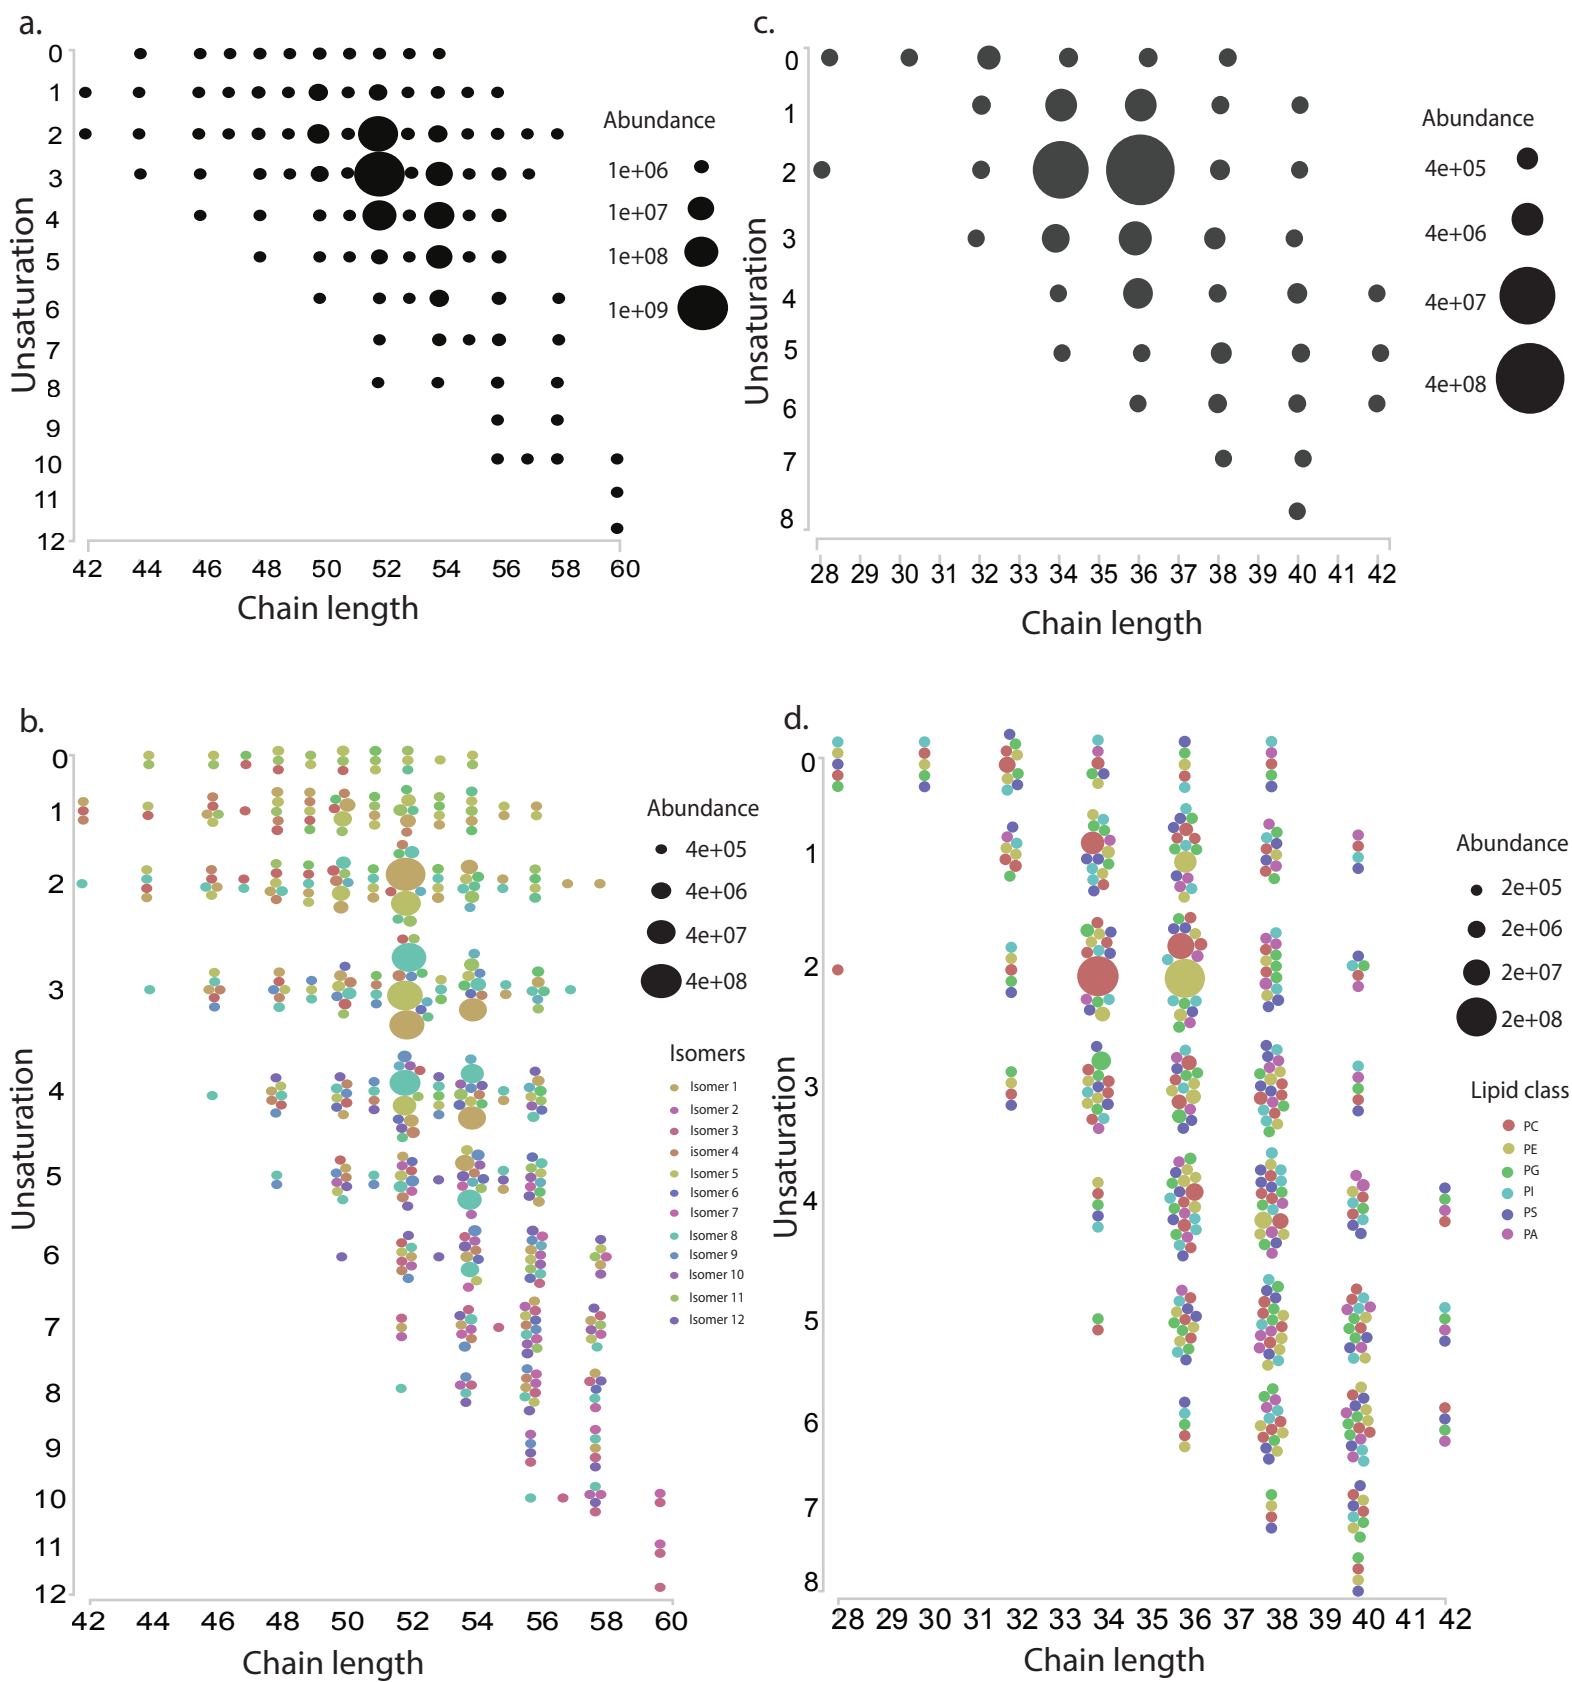

Figure 3.

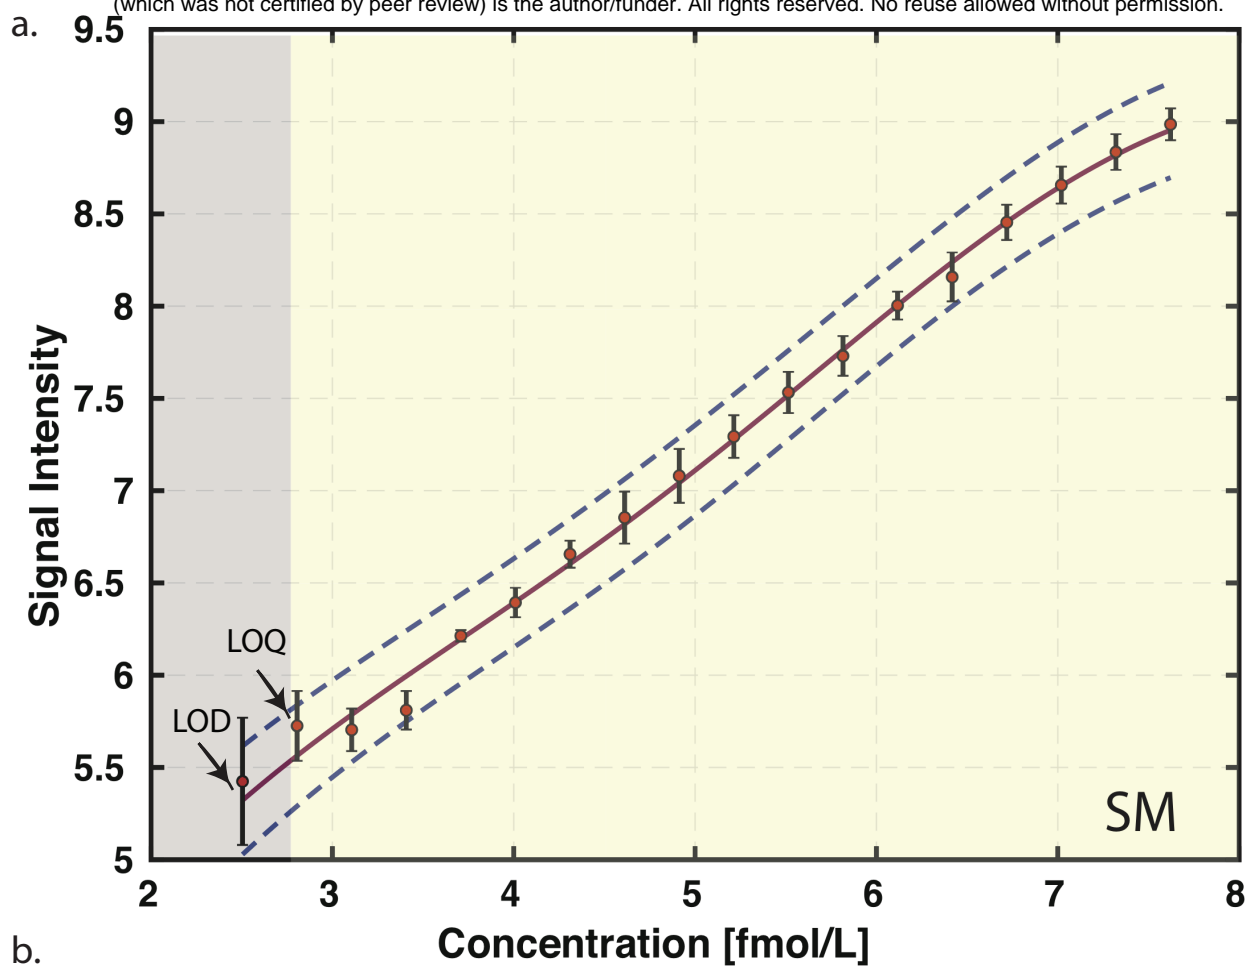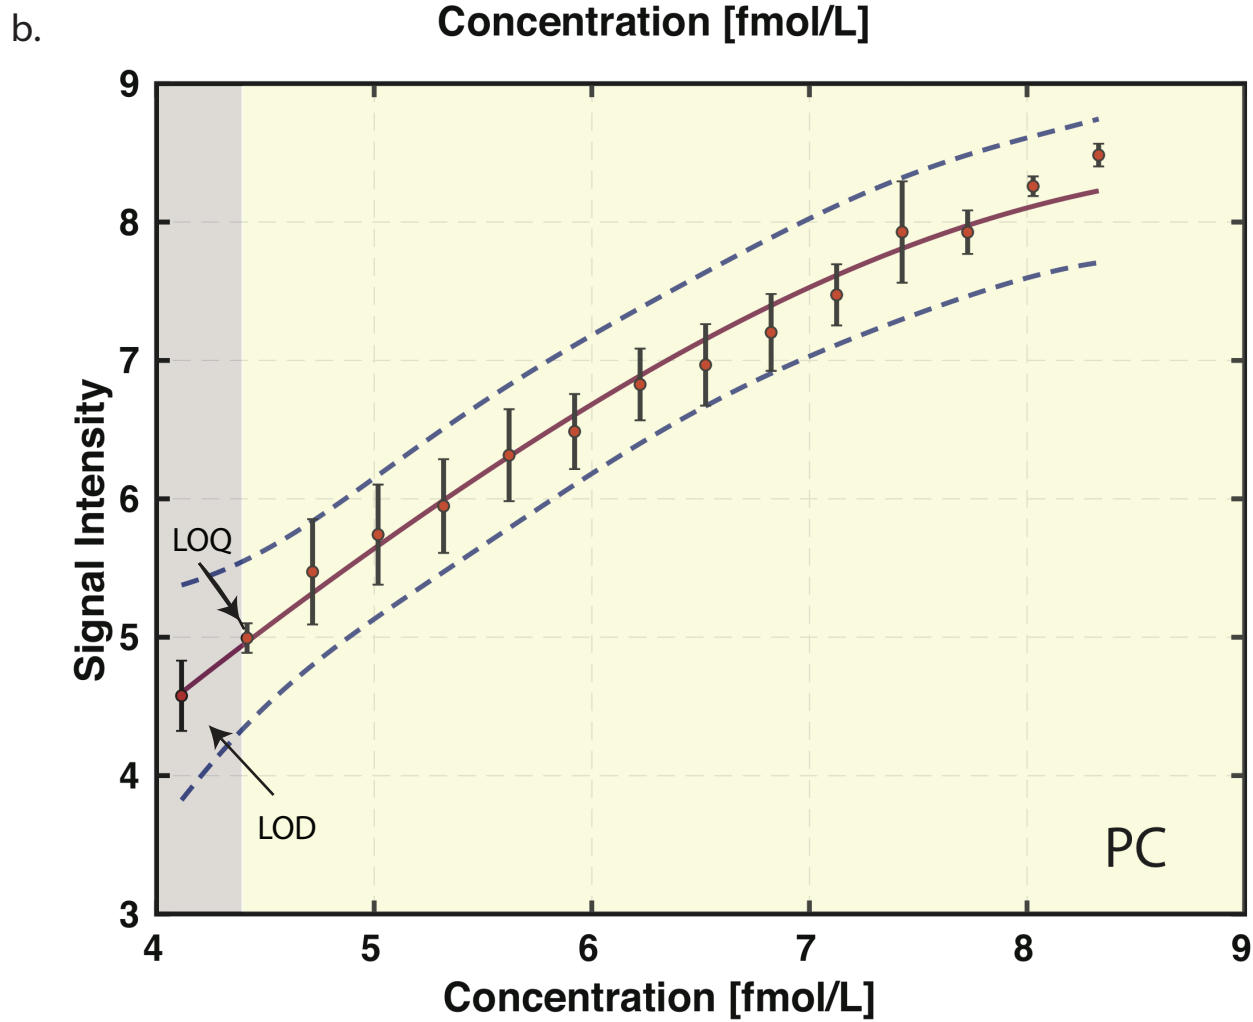

Figure 4.

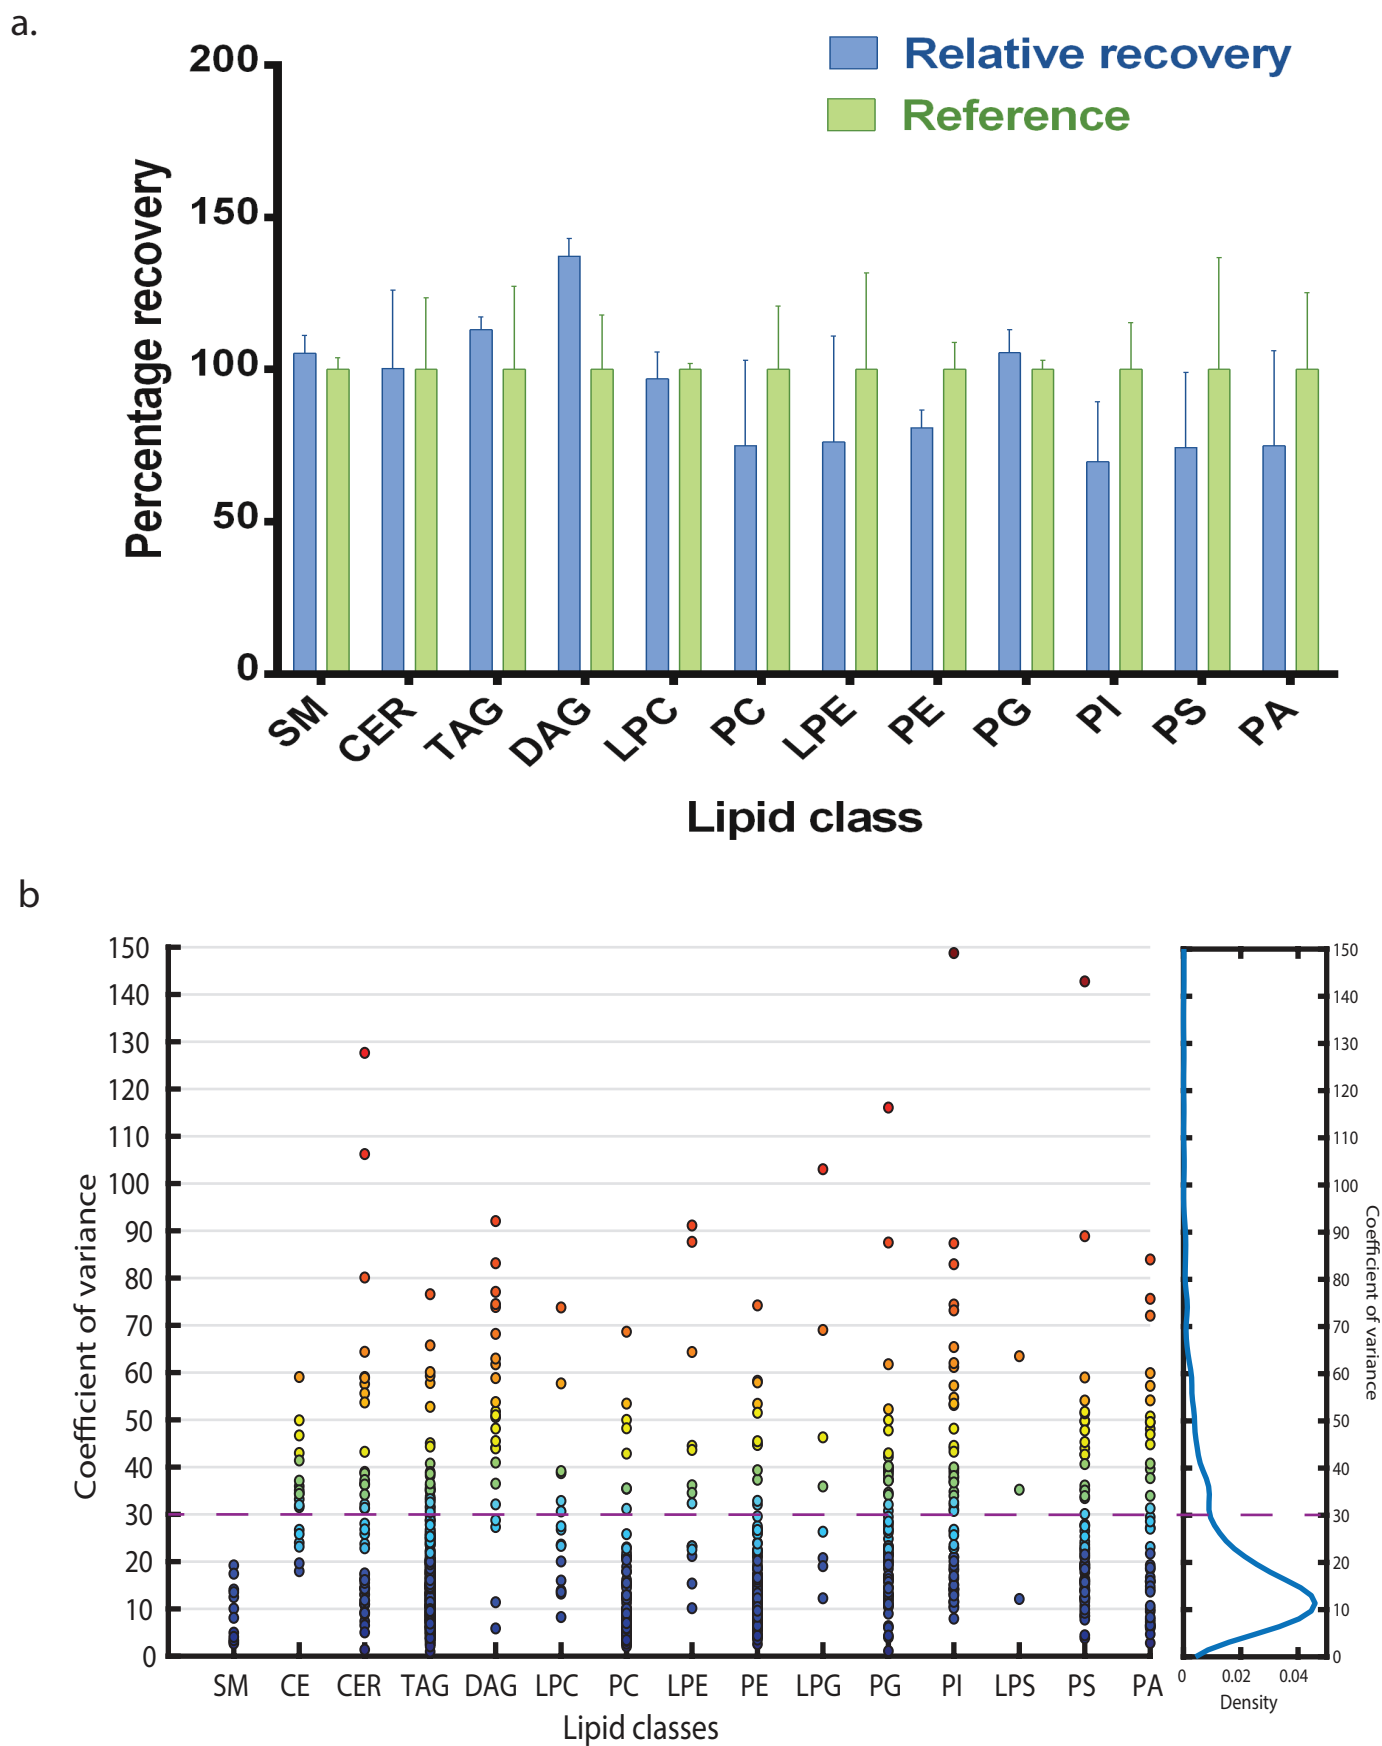

Figure5.

a. Omega 3 - 20:5

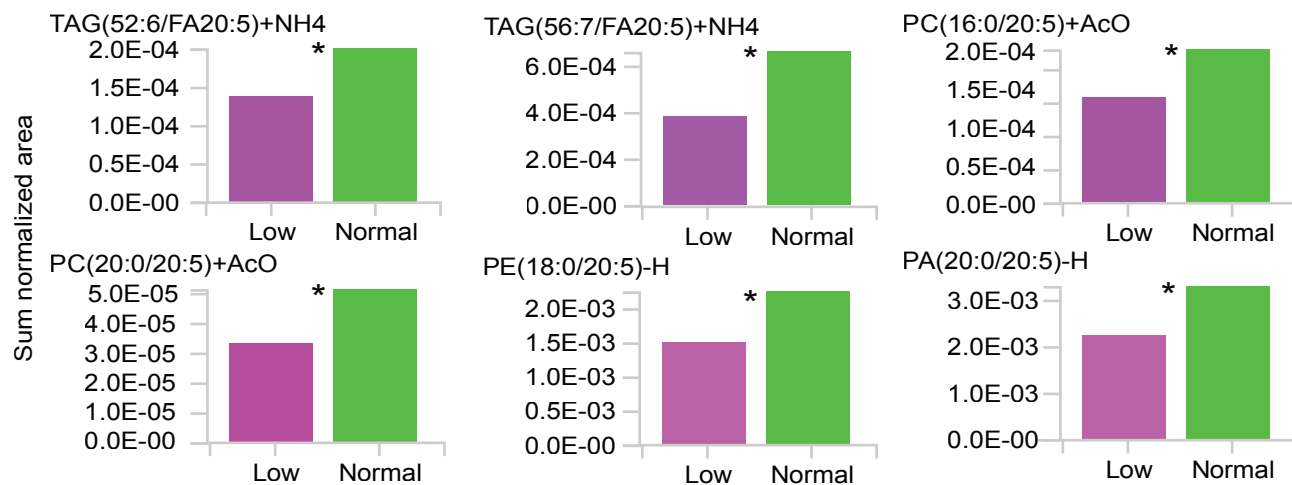

b. Omega 6 - 18:2

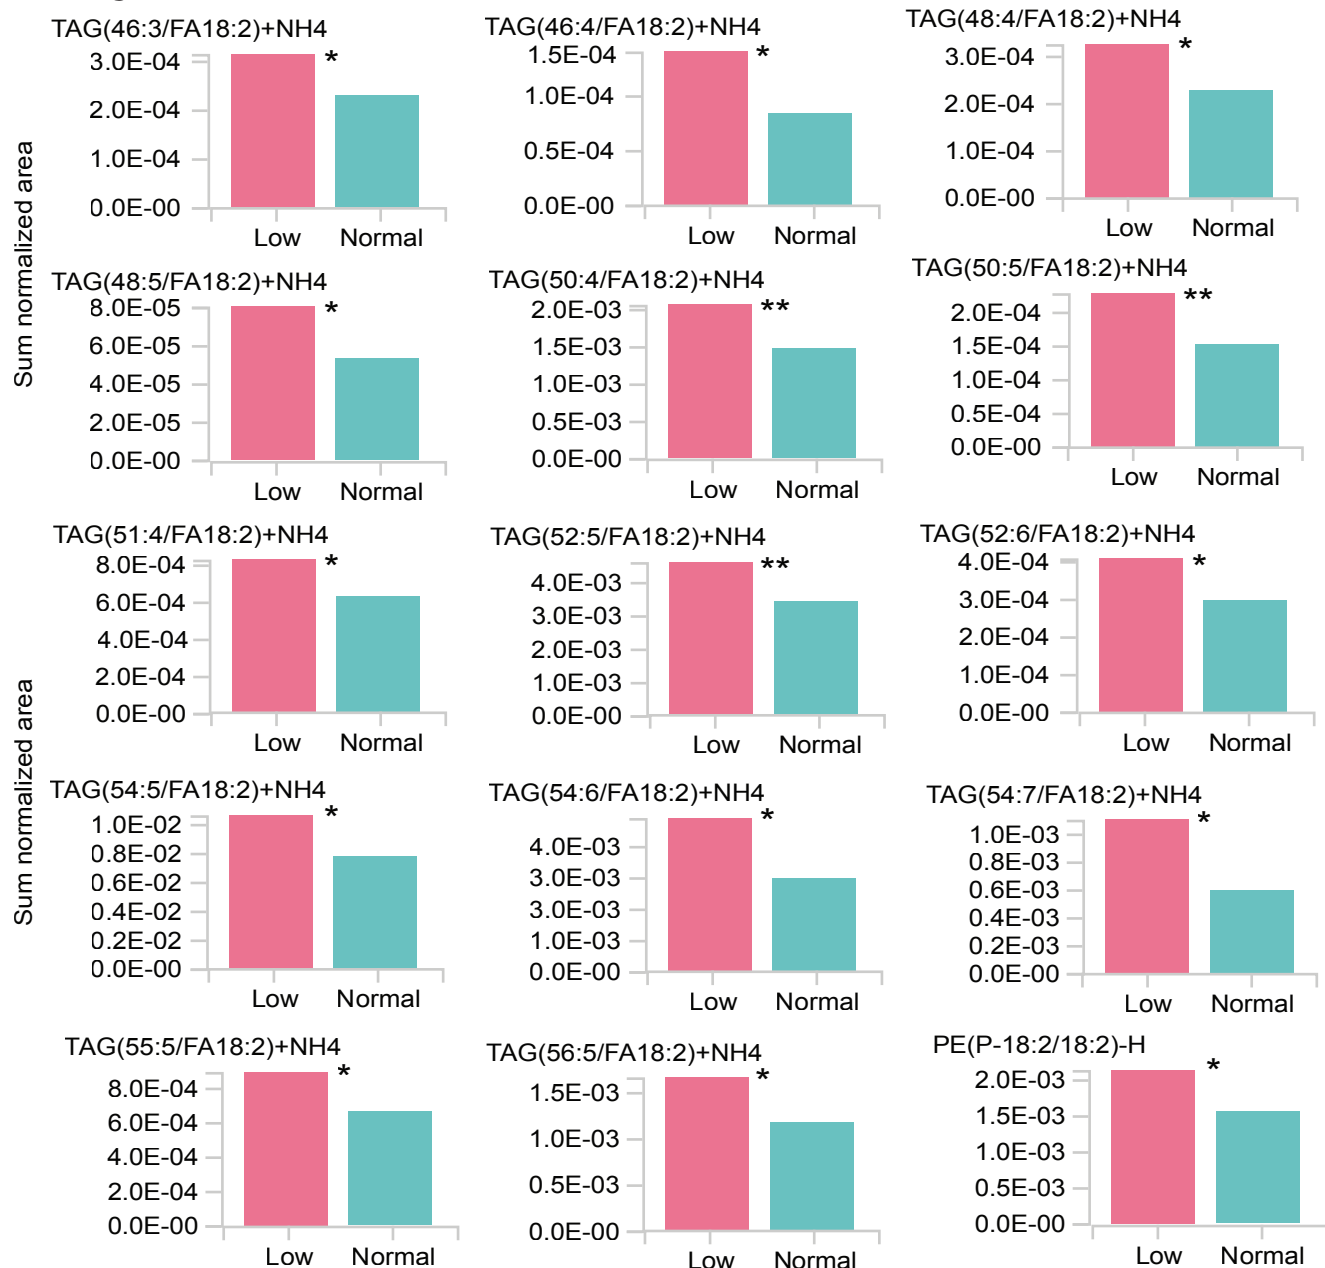

Figure6.
